# Supplementary material for: An Interview study with Professionals on Shared Decision-Making in Child and Adolescent Mental Health
Source: Research Square preprint supplement (doi:10.21203/rs.3.rs-5985208/v1), 2025-02-14
Supplement: Supplementary file 1 [file 10beaa0285d586f17cc6bcaa.docx]

**Supplementary table 1.** Frequency and proportion of occurrence of categories and themes

| **Category** | **Topic** | **Codes** | **%** | **Words** | **%** |
| --- | --- | --- | --- | --- | --- |
|  | Current implementation | **10** | **5.5** | **544** | **3.4** |
| **Requirements** |  | **74** | **40.4** | **6653** | **41.5** |
|  | Professional attitudes | 22 | 12.0 | 1454 | 9.1 |
|  | Working with young people | 36 | 19.7 | 3623 | 22.6 |
|  | Working with families | 7 | 3.8 | 998 | 6.2 |
|  | Systemic changes | 9 | 4.9 | 578 | 3.6 |
| **Benefits** |  | **22** | **12.1** | **1999** | **12.4** |
|  | Engagement | 10 | 5.5 | 787 | 4.9 |
|  | Autonomy | 4 | 2.2 | 404 | 2.5 |
|  | Shared responsibility | 8 | 4.4 | 808 | 5.0 |
| **Limitations** |  | **36** | **19.7** | **2212** | **13.7** |
|  | Resource constraints | 21 | 11.5 | 921 | 5.7 |
|  | Paternalism | 6 | 3.3 | 486 | 3.0 |
|  | Family barriers | 9 | 4.9 | 805 | 5.0 |
| **Dilemmas** |  | **41** | **22.4** | **4641** | **28.9** |
|  | Age | 11 | 6.0 | 829 | 5.2 |
|  | Complex situations | 20 | 10.9 | 2953 | 18.4 |
|  | Information management | 6 | 3.3 | 581 | 3.6 |
|  | Individualised support | 4 | 2.2 | 278 | 1.7 |
